# Supplementary material
Source: PubMed Central journal article supplement (PMC9212214)

Mutagenesis of the Cleavage Site of (Pro)Renin Receptor Abrogates Angiotensin II-Induced Hypertension in  
Mice

Fei Wang<sup>1\*</sup>, Yanting Chen<sup>1\*</sup>, Chang-jiang Zou<sup>1</sup>, Renfei Luo<sup>1</sup>, and Tianxin Yang<sup>1</sup>

<sup>1</sup>Department of Internal Medicine, University of Utah and Veterans Affairs Medical Center, Salt Lake City, Utah, USA.

\*, equal contribution

Running title: sPRR and AngII hypertension

Address correspondence to:  
Tianxin Yang, M.D., Ph.D.  
University of Utah and Veterans Affairs Medical Center  
Division of Nephrology and Hypertension  
30N 1900E, RM 4C224  
Salt Lake City, UT 84132  
Tel: 801-585-5570  
Fax: 801-584-5658  
Email: Tianxin.Yang@hsc.utah.edu

## Methods

*Mouse Experiment.* Male 16 to 20-week-old PRR<sup>R279V/L282V</sup> mice and their littermate wild-type (WT) controls were studied. Five days prior to AngII treatment, the radiotelemetric device was implanted via catheterization of carotid artery. Blood pressure (BP) readings were taken every 5 minutes throughout the acute experiment. After the baseline blood pressure (BP) parameters were recorded, all mice were administered with vehicle or a single bolus subcutaneous injection of Ang II at 30 µg/kg. After injection, BP was continuously recorded for 90 mins.

*Immunoblotting.* Heart, liver, adipose, vessel, adrenal gland, muscle were lysed and subsequently sonicated in PBS that contained 1% Triton x-100, 250 µM phenylmethanesulfonyl fluoride (PMSF), 2 mM EDTA, and 5 mM dithiothriitol (DTT) (pH 7.5). Protein concentrations were determined by using Coomassie reagent. Forty µg of proteins for each sample was denatured in boiling water for 10 min, then separated by SDS-PAGE gel, and transferred onto nitrocellulose membranes. The blots were blocked overnight with 5% nonfat dry milk in Tris-buffered saline (TBS), followed by incubation overnight with primary antibody. After being washed with TBS, blots were incubated with horseradish peroxidase (HRP)-conjugated secondary antibody and visualized using Enhanced Chemiluminescence (ECL). Primary antibodies are as follows: rabbit anti-PRR antibody (cat no. HPA003156; Sigma), rabbit anti-LC3b antibody (cat no. Ab48394; Abcam), rabbit anti-p62 antibody (cat no. Ab109012; Abcam), rat anti-LAMP2 antibody (cat no. Ab13524; Abcam), mouse anti-β-actin antibody (cat no. A1978; Sigma).

*Histological analysis.* Formalin-fixed renal tissues were subsequently embedded in paraffin. Four-micrometer sections were cut from these tissue blocks and stained with Hematoxylin and Eosin (H&E) to evaluate gross morphology. For each individual animal, five non-overlapping fields of renal cortex, or outer medulla, or inner medulla were assessed under high magnification (400×). All examinations were performed independently in a blinded manner by two individuals.

*Enzyme immunoassay.* The angiotensinogen (AGT), angiotensin I (AngI) and aldosterone in biologic fluids were determined by using the commercially available enzyme immunoassay kits according to the manufacturer's instructions: the kits for AGT (cat no. JP27413; IBL), Ang I (cat no. S-1188; Peninsula Laboratories International), and aldosterone (cat no. Ab136933, Abcam) .

*Cell experiments.* As4.1 cells were cultured in DMEM medium with high glucose, sodium pyruvate, and L-Glutamine supplemented with 10% fetal bovine serum. M-1 cells were cultured in DMEM/F12 medium with 2.5 mM L-glutamine adjusted to contain 15 mM HEPES, 0.5 mM sodium pyruvate and 1.2 g/L sodium bicarbonate supplemented with 0.005 mM dexamethasone and 5% fetal bovine serum. Upon confluence, cells were serum-starved for 12 h, and then treated with 10 nM sPRR-His alone or in combination treatment with 10 µM ICG-001 (HY-14428, Med Chem Express). After 24 h treatment, the cells and medium were then harvested for analysis.

*Statistical analysis.* GraphPad Prism software (version 8.4) was used for data analysis. Data is summarized as means  $\pm$  SEM. All data points represent animals that were included in the statistical analyses. Sample sizes were determined on the basis of similar previous studies or pilot experiments. The animal experiments were performed by using regular two-way ANOVA with the Bonferroni test for multiple comparisons or by using unpaired two-tailed Student's t test for 2 comparisons. The cell experiments were performed by using regular one-way ANOVA with the Bonferroni test for multiple comparisons. A value of  $P < 0.05$  was considered statistically significant.

### Supplemental Figure Legend

Figure. S1. Assessment of sPRR protein abundance in various types of tissues in male 16 to 20-week-old PRR<sup>R279V/L282V</sup> mice and their littermate controls. Heart, liver, adipose tissue, vessel, adrenal gland, and muscle from WT and PRR<sup>R279V/L282V</sup> were subjected to immunoblotting analysis of sPRR abundance. Densitometry values are shown underneath the blots. \* $P < 0.05$  vs. mutant group, \*\* $P < 0.01$  vs. mutant group.  $N = 4$  per each group. WT, wild-type; Mutant, PRR<sup>R279V/L282V</sup>.

Figure. S2. Histological analysis and assessment of autophagic-lysosomal markers in male 16 to 20-week-old PRR<sup>R279V/L282V</sup> mice and their littermate controls. Formalin-fixed renal tissues from WT and PRR<sup>R279V/L282V</sup> mice were embedded in paraffin, followed by H&E staining to evaluate gross morphology under low (40x) and high magnification (400x) (A). Renal tissues from WT and PRR<sup>R279V/L282V</sup> mice were subject to immunoblotting analysis of the autophagosome markers expression (B) and lysosome marker expression (C).  $N = 5$  per each group. WT, wild-type; Mutant, PRR<sup>R279V/L282V</sup>.

Figure. S3. Blood pressure response of PRR<sup>R279V/L282V</sup> mice to acute AngII treatment. WT and PRR<sup>R279V/L282V</sup> mice were instrumented with radiotelemetric devices and after 5 days of recovery were treated with vehicle or AngII ( $n = 5$  per each group). A single bolus of Ang II (30  $\mu\text{g}/\text{kg}$ ) or vehicle was administrated at 35 mins via subcutaneous injection. (A) systolic blood pressure (SBP), (B) mean arterial blood pressure (MAP), (C) diastolic blood pressure (DBP), and (D) heart rate (HR). The statistical significance was determined by using one-way ANOVA with the Bonferroni test for multiple comparisons. \*,  $p < 0.05$  WT + AngII vs. WT + Vehicle group. #,  $p < 0.05$  Mutant + AngII vs. Mutant + Vehicle. Data are mean  $\pm$  SE. WT, wild-type; Mutant, PRR<sup>R279V/L282V</sup>.

Figure. S4. Physiological parameters in WT and PRR<sup>R279V/L282V</sup> mice during chronic AngII infusion. WT and PRR<sup>R279V/L282V</sup> mice were chronically infused with vehicle or AngII as described in Fig. 2. At the end of the experiment, animals were placed in metabolic cages and following parameters

were collected. (A) Body weight, (B) Heart weight, (C) Urine output, and (D) Urinary sodium excretion. The statistical significance was determined by using one-way ANOVA with the Bonferroni test for multiple comparisons, and the p values were indicated in the figure. Data are mean  $\pm$  SE. WT, wild-type; Mutant, PRR<sup>R279V/L282V</sup>.

Figure. S5. Renin enzyme activity assay on biological fluid and renal samples. Plasma, urine, tissue lysates of the renal cortex and inner medulla samples from WT and PRR<sup>R279V/L282V</sup> mice following vehicle or AngII treatment were collected at the end of the experiment (day 14), and subjected to renin enzyme activity assay for assessment of renin activity (A&C&E&G), active renin content (B&D&F&H). The statistical significance was determined by using two-way ANOVA with the Bonferroni test for multiple comparisons, and the p values were indicated in the figure. Data are mean  $\pm$  SE. WT, wild-type; Mutant, PRR<sup>R279V/L282V</sup>.

Figure. S6. ELISA measurement of prorenin/renin in WT and PRR<sup>R279V/L282V</sup> mice during chronic AngII infusion. Samples were collected at the end of the experiment (day 14) (A) Plasma prorenin/renin, (B) Urinary prorenin/renin excretion, (C) Renal cortical prorenin/renin content, and (D) Renal medullary prorenin/renin content. The statistical significance was determined by using two-way ANOVA with the Bonferroni test for multiple comparisons, and the p values were indicated in the figure. N = 5 per group. Data are mean  $\pm$  SE. WT, wild-type; Mutant, PRR<sup>R279V/L282V</sup>.

Figure. S7. ELISA measurement of AGT, aldosterone, and AngI in WT and PRR<sup>R279V/L282V</sup> mice during chronic AngII infusion. Samples were collected at the end of the experiment (day 14) (A) Plasma AGT, (B) Urinary AGT excretion, (C) Plasma aldosterone, (D) Plasma AngI, (E) Urinary AngI excretion, (F) Renal cortical AngI content, and (G) Renal medullary AngI content. The statistical significance was determined by using two-way ANOVA with the Bonferroni test for multiple comparisons, and the p values were indicated in the figure. N = 5 per group. Data are mean  $\pm$  SE. WT, wild-type; Mutant, PRR<sup>R279V/L282V</sup>.

Figure. S8. Assessment of renal expression of sodium transporters in WT and PRR<sup>R279V/L282V</sup> mice during chronic AngII infusion. Renal cortex from these animals was subjected to immunoblotting analysis of NHE3, NKCC2, and NCC. N = 5 per group. WT, wild-type; Mutant, PRR<sup>R279V/L282V</sup>.

Figure. S9. In vitro assessment of ENaC activity. Confluent primary IMCD cells from WT or PRR<sup>R279V/L282V</sup> mice on Snapwells were treated with vehicle or 1  $\mu$ M AngII for 24 h. Amiloride-sensitive transepithelial Na<sup>+</sup> transport, an index of ENaC activity, was recorded by Ussing chamber technique. N = 4 per each group. The statistical significance was determined by using two-way ANOVA with the Bonferroni test for multiple comparisons, and the p values were indicated in the figure. Data are mean  $\pm$  SE. WT, wild-type; Mutant, PRR<sup>R279V/L282V</sup>.

Figure. S10. The role and mechanism of sPRR in regulation of renin expression in cultured As4.1 and M-1 cells. The confluent cells were pretreated for 1 h with the  $\beta$ -catenin inhibitor ICG-001 at 10  $\mu$ M and then treated for 24h with 10 nM sPRR-His. At the end of the experiment, cells and/or the media were harvested for qRT-PCR analysis of renin mRNA, enzyme activity-based assay for renin activity, active renin content, and total renin content, and ELISA measurement of prorenin/renin content. (A) Medium total prorenin/renin content in As4.1 cells. (B) Cellular renin activity in As4.1 cells. (C) Cellular active renin content in As4.1 cells. (D) Medium total prorenin/renin content in M-1 cells. (E) Cellular renin activity in M-1 cells. (F) Cellular active renin content in M-1 cells. N = 5-8 per group. Data are mean  $\pm$  SE.

Figure S1

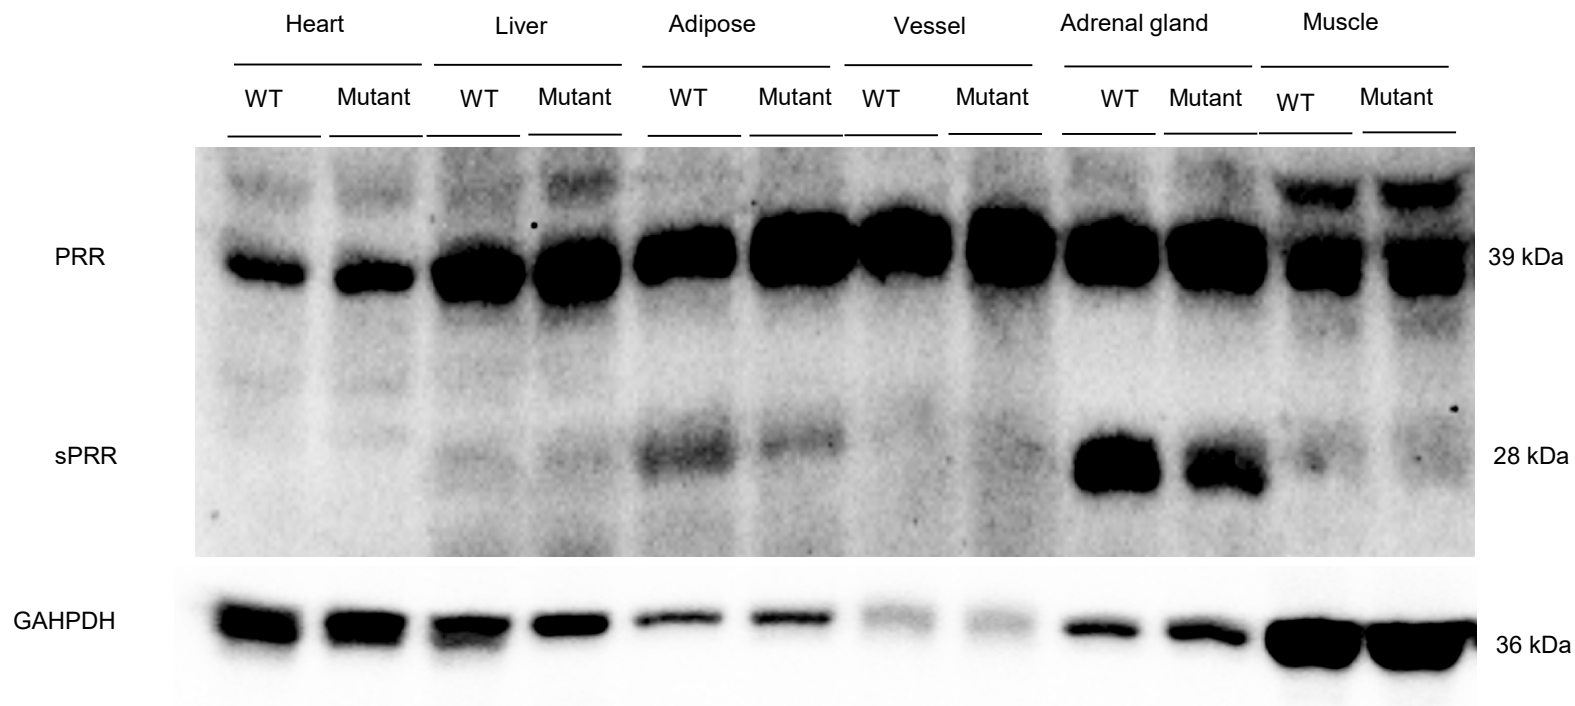

|            | Heart             |                    | Liver             |                   | Adipose           |                     | Vessel            |                   | Adrenal gland     |                      | Muscle            |                  |
|------------|-------------------|--------------------|-------------------|-------------------|-------------------|---------------------|-------------------|-------------------|-------------------|----------------------|-------------------|------------------|
|            | WT                | Mutant             | WT                | Mutant            | WT                | Mutant              | WT                | Mutant            | WT                | Mutant               | WT                | Mutant           |
| PRR/GAPDH  | 1.00<br>±<br>0.01 | 1.39<br>±<br>0.04* | 4.32<br>±<br>0.05 | 4.32<br>±<br>0.06 | 4.69<br>±<br>0.04 | 8.47<br>±<br>0.46*  | 7.94<br>±<br>0.04 | 7.85<br>±<br>0.05 | 5.09<br>±<br>0.16 | 6.01<br>±<br>0.11*   | 0.56<br>±<br>0.03 | .61<br>±<br>0.01 |
| sPRR/GAPDH | N/A               | N/A                | N/A               | N/A               | 3.68<br>±<br>0.23 | 1.32<br>±<br>0.16** | N/A               | N/A               | 5.01<br>±<br>0.28 | 2.36<br>±<br>0.248** | N/A               | N/A              |

Figure S2

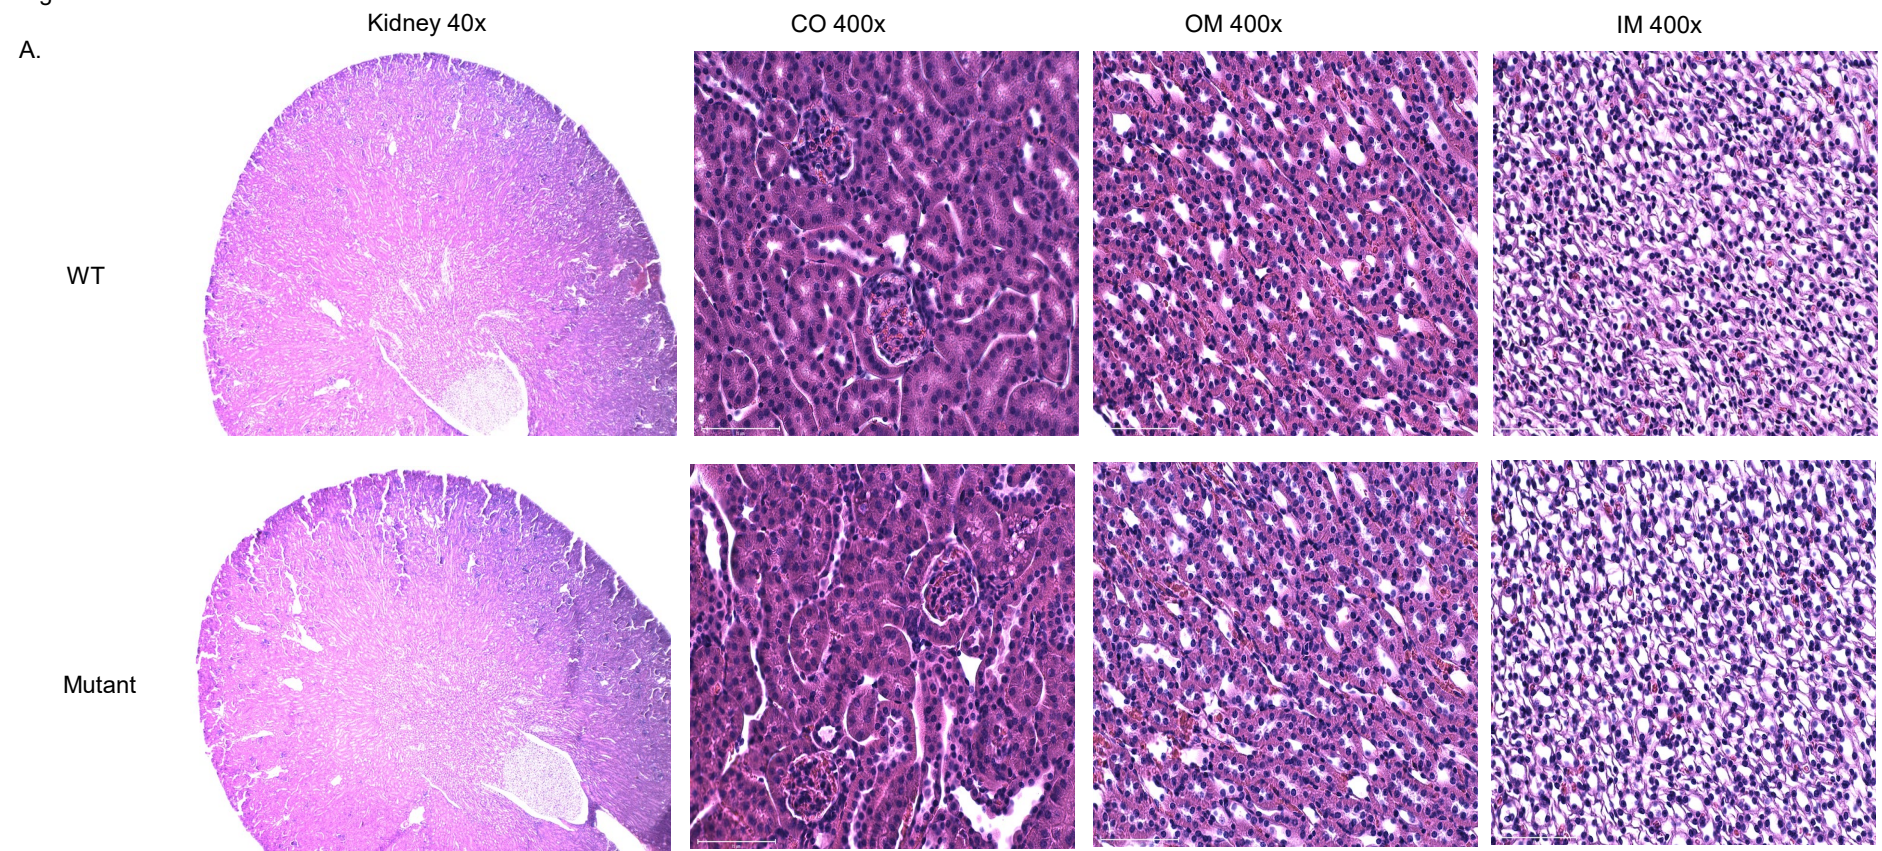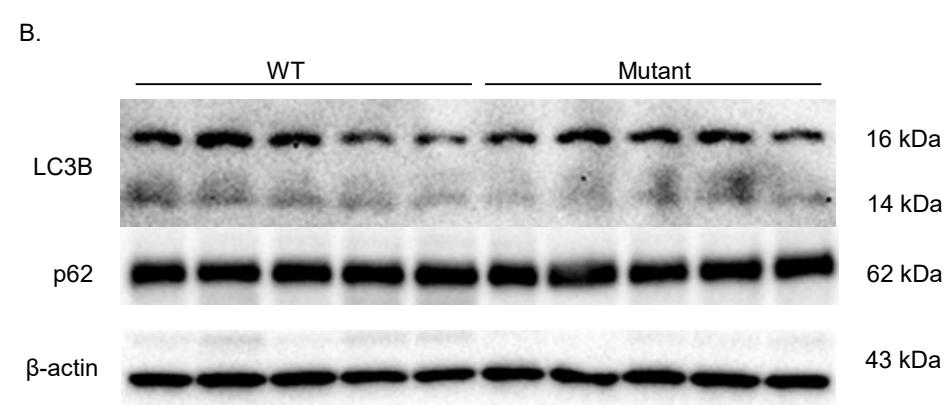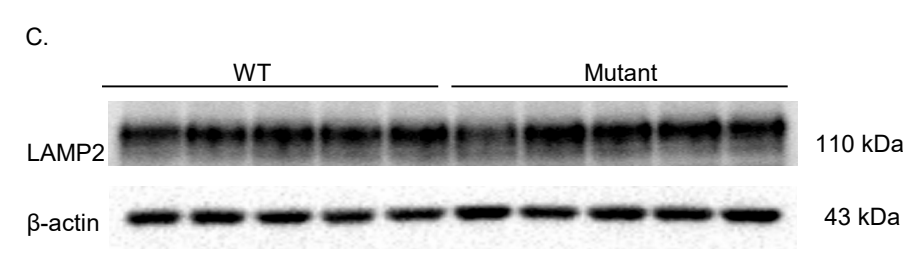

Figure S3

A.

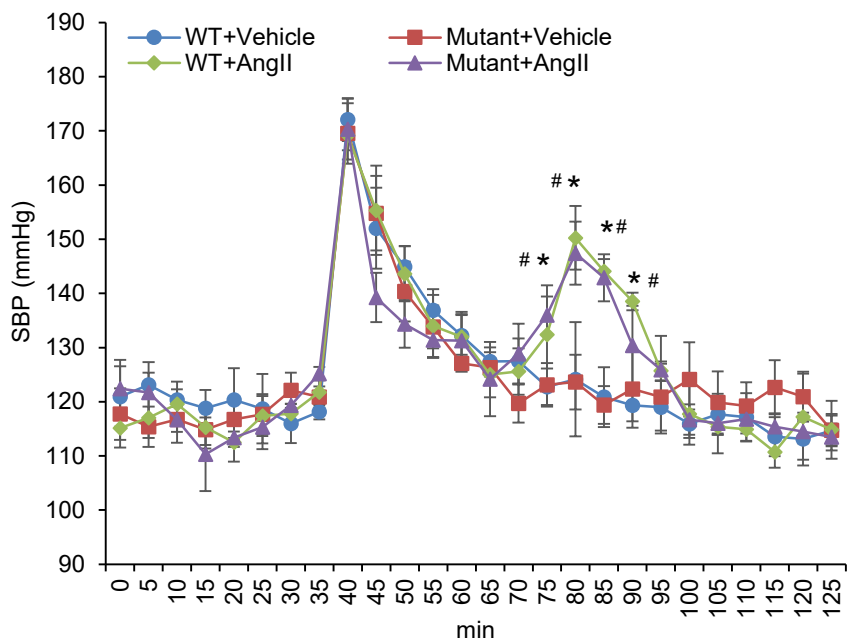

B.

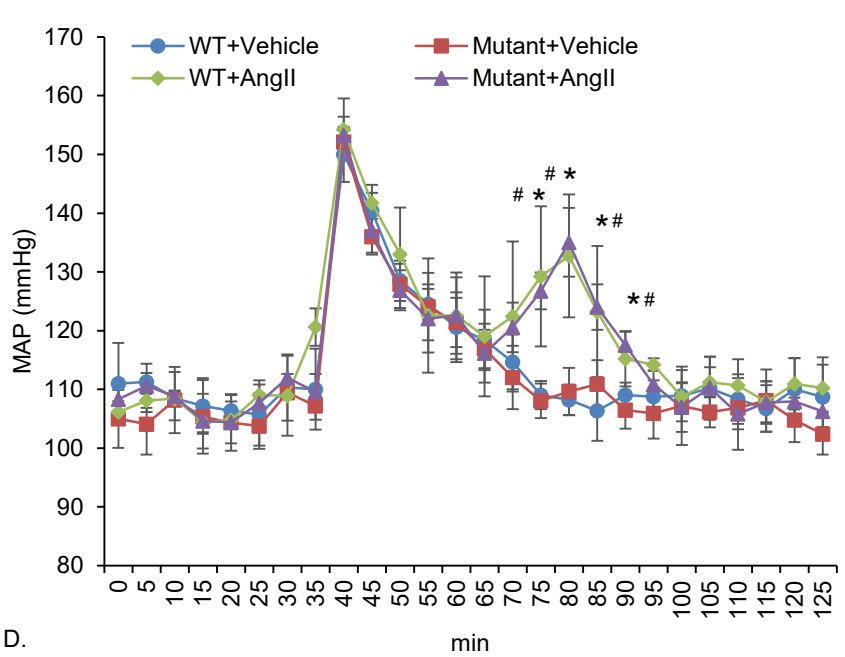

C.

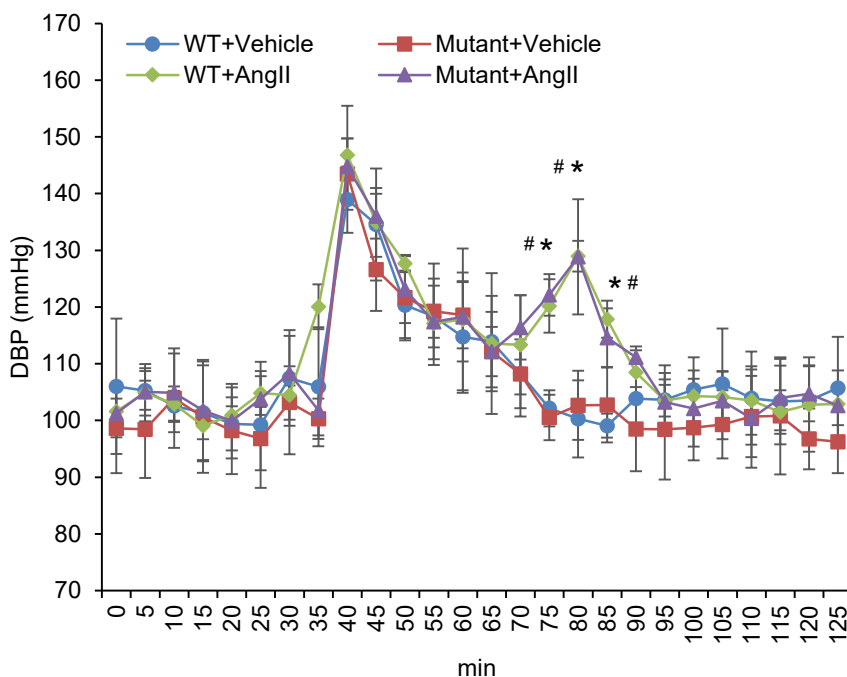

D.

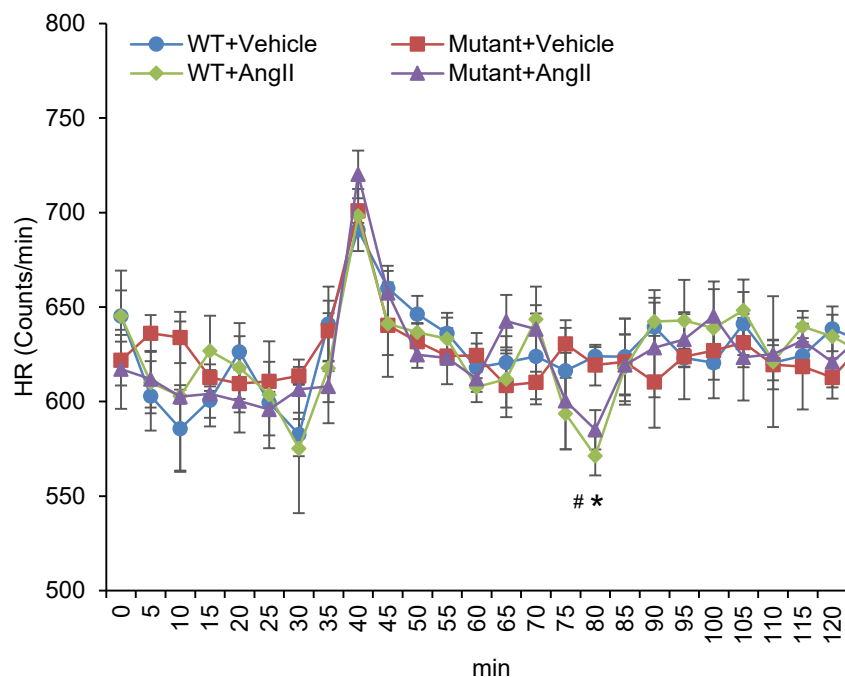



Figure S4

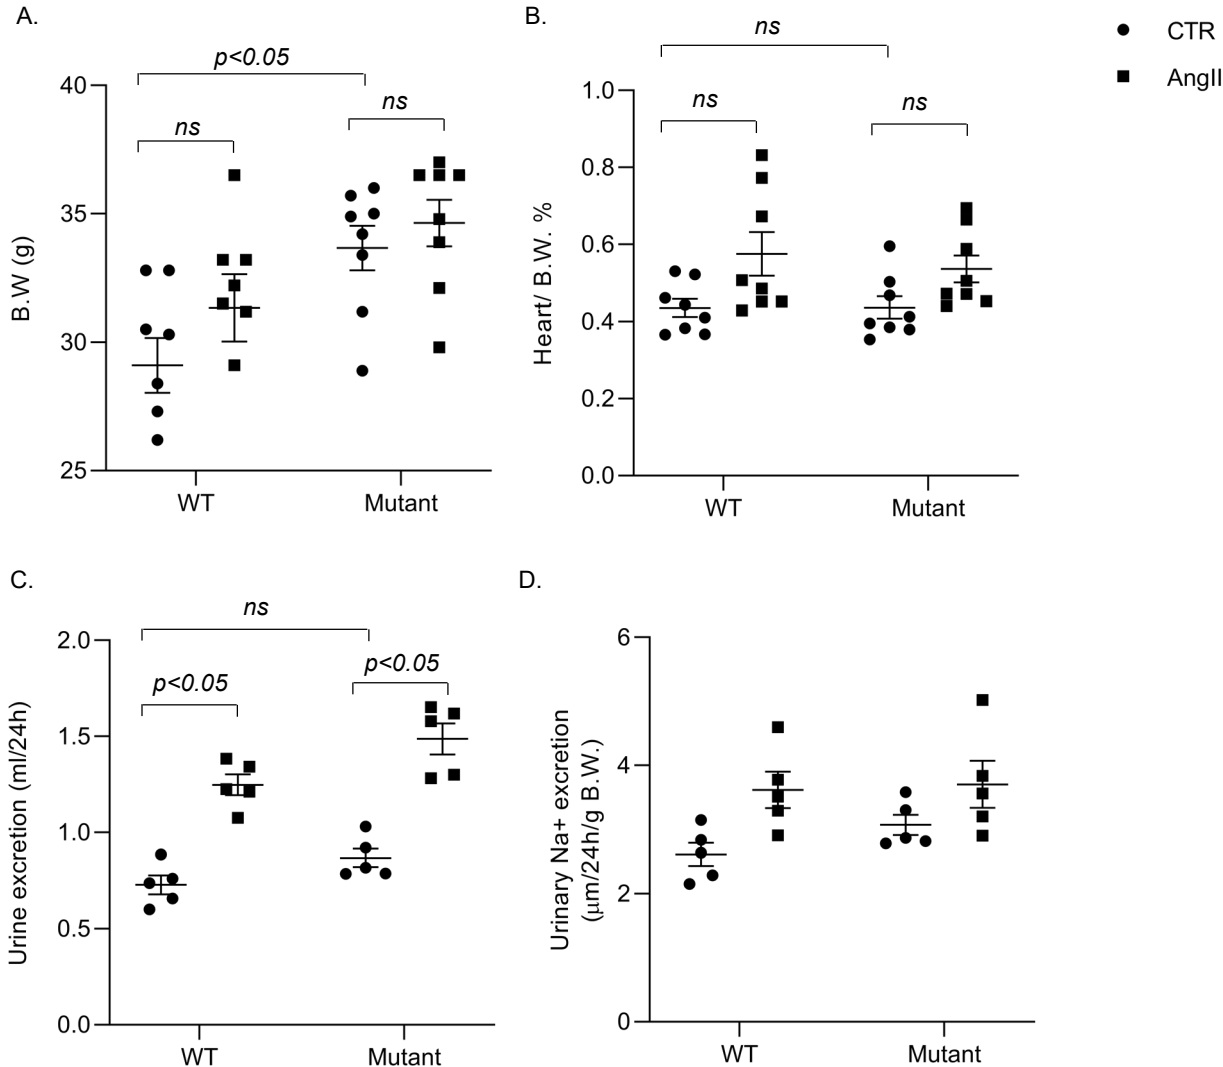

Figure S5

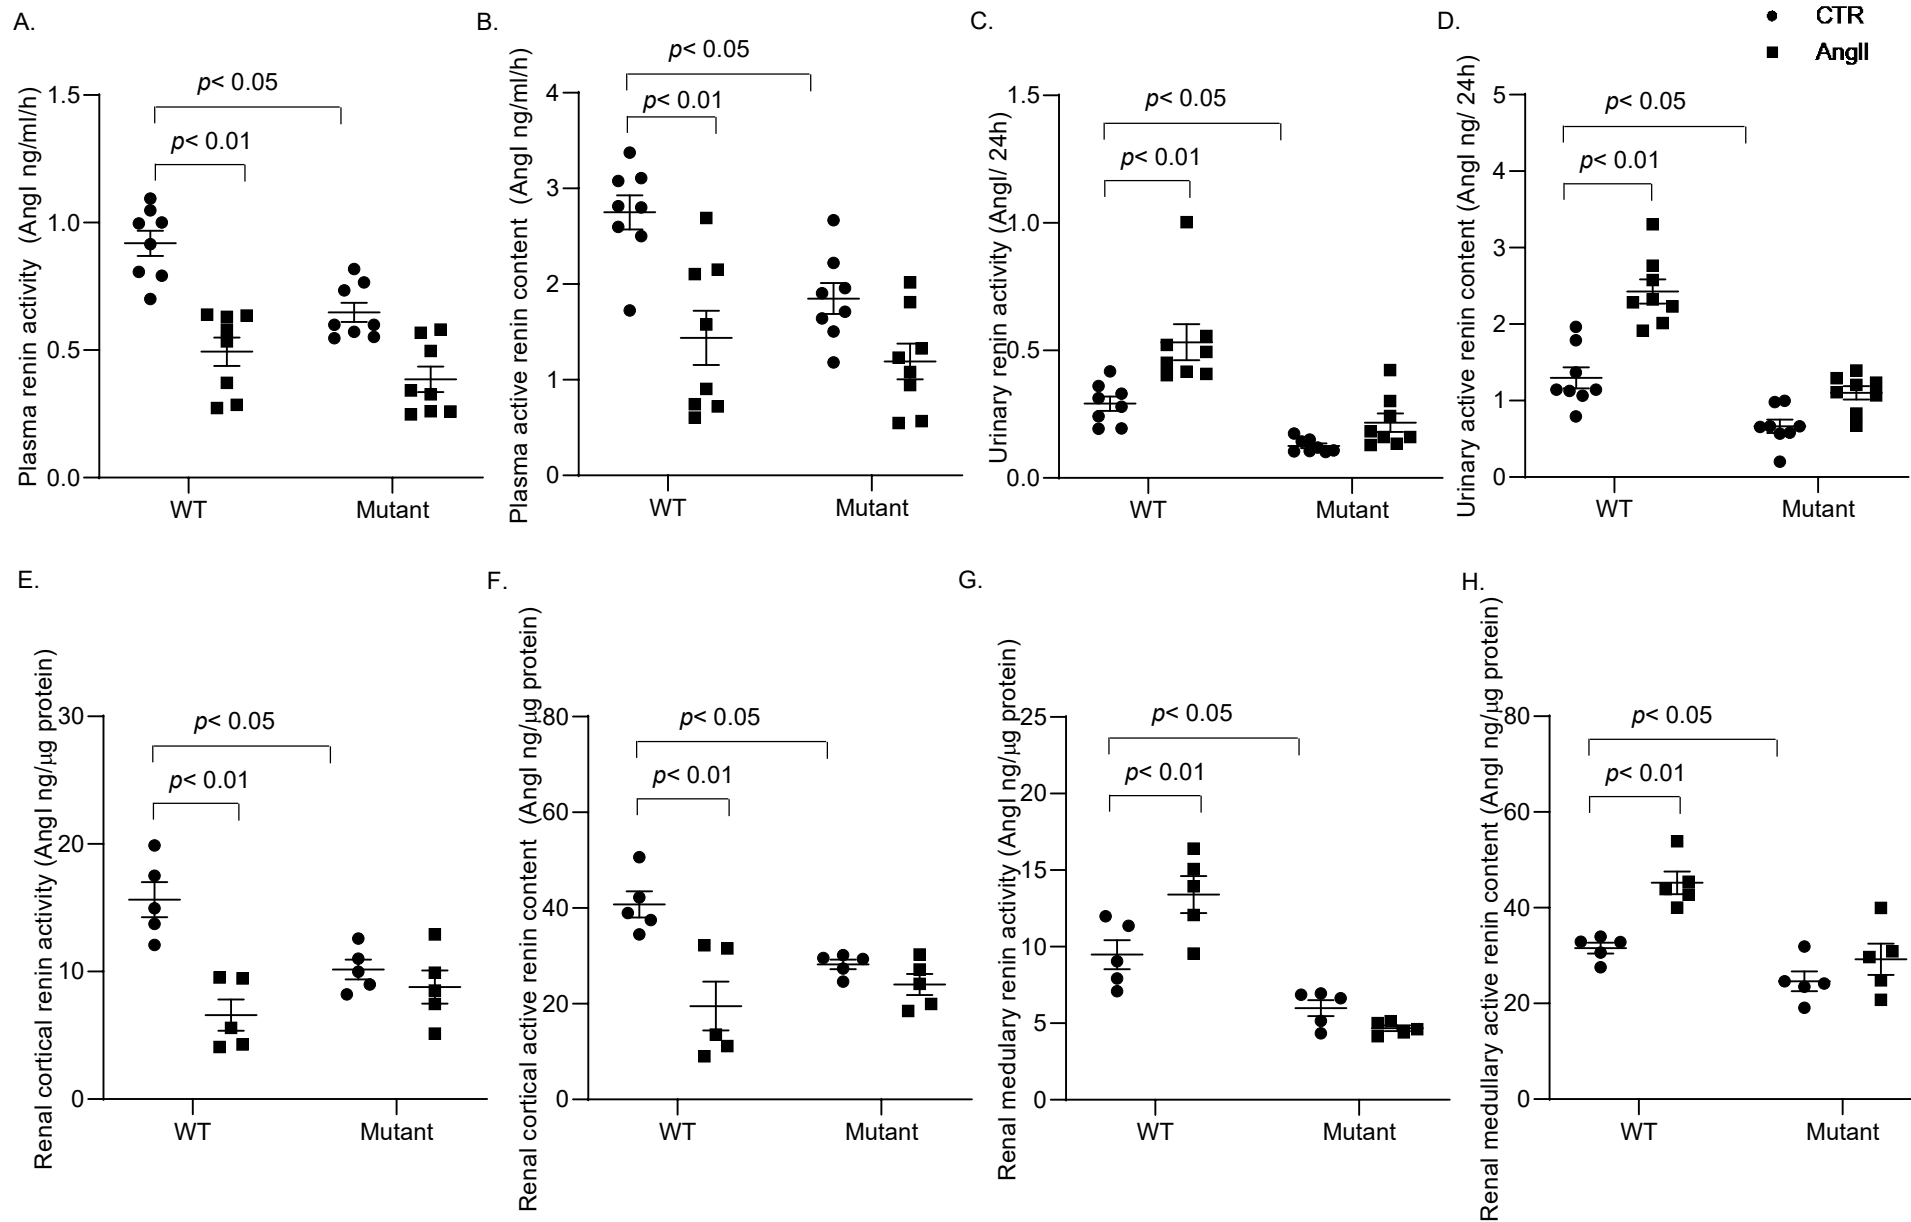

Figure S6

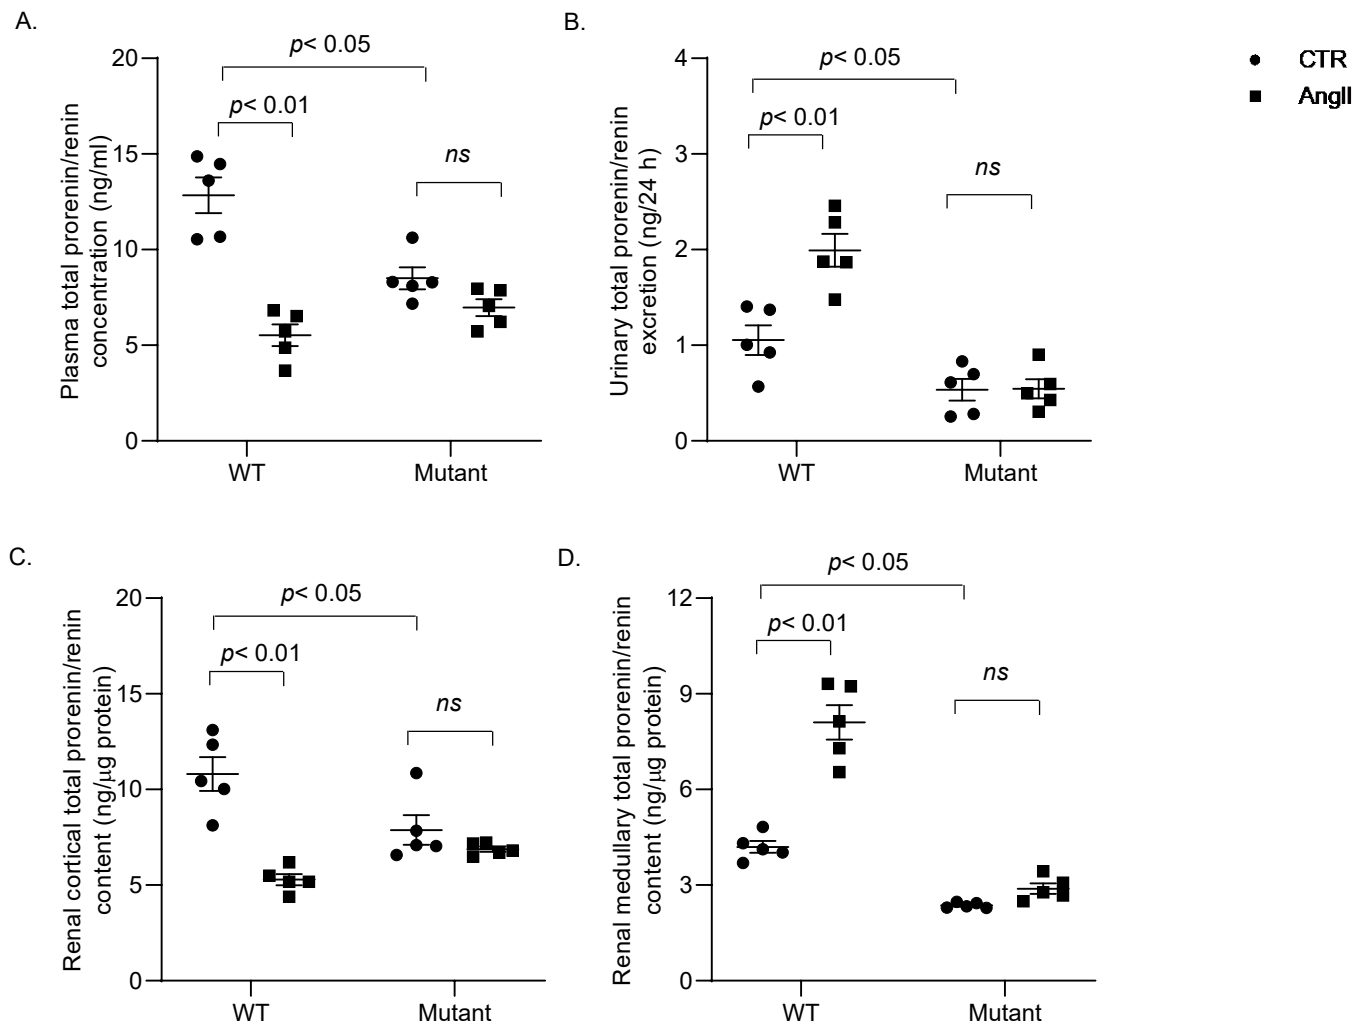

Figure S7

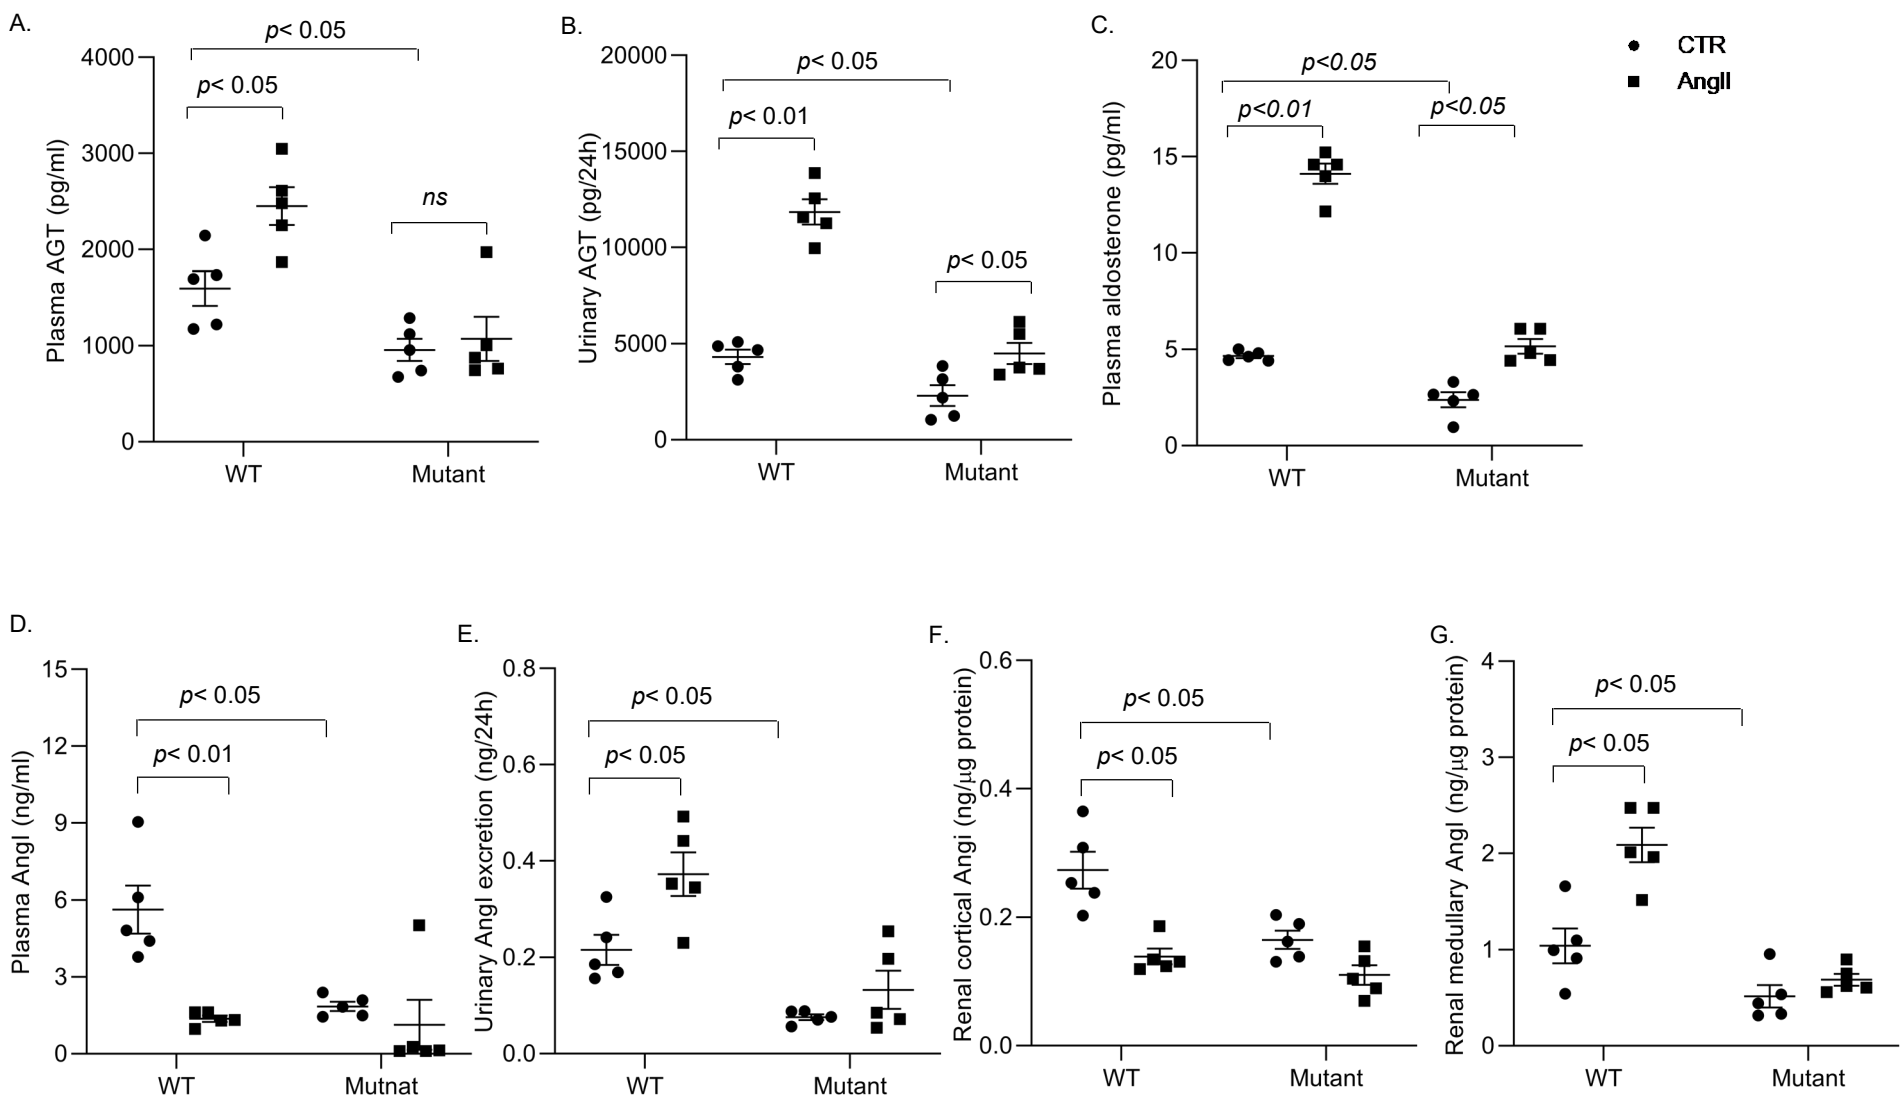



Figure S9

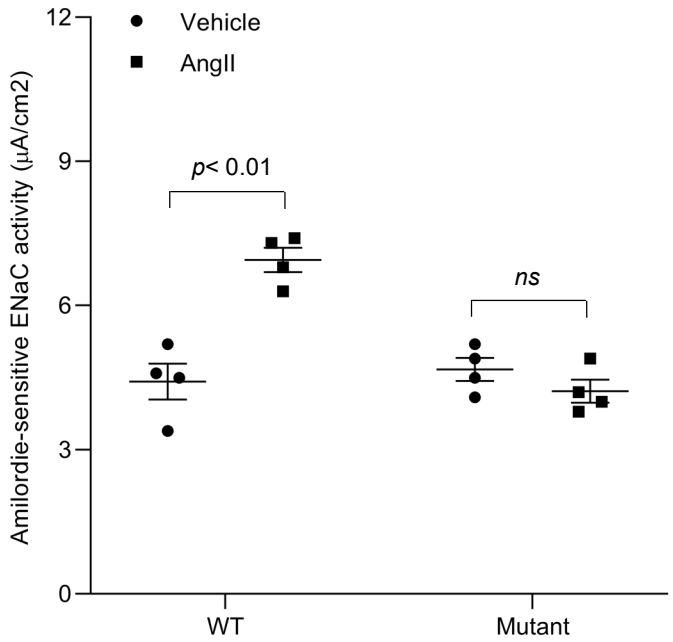

Figure S10

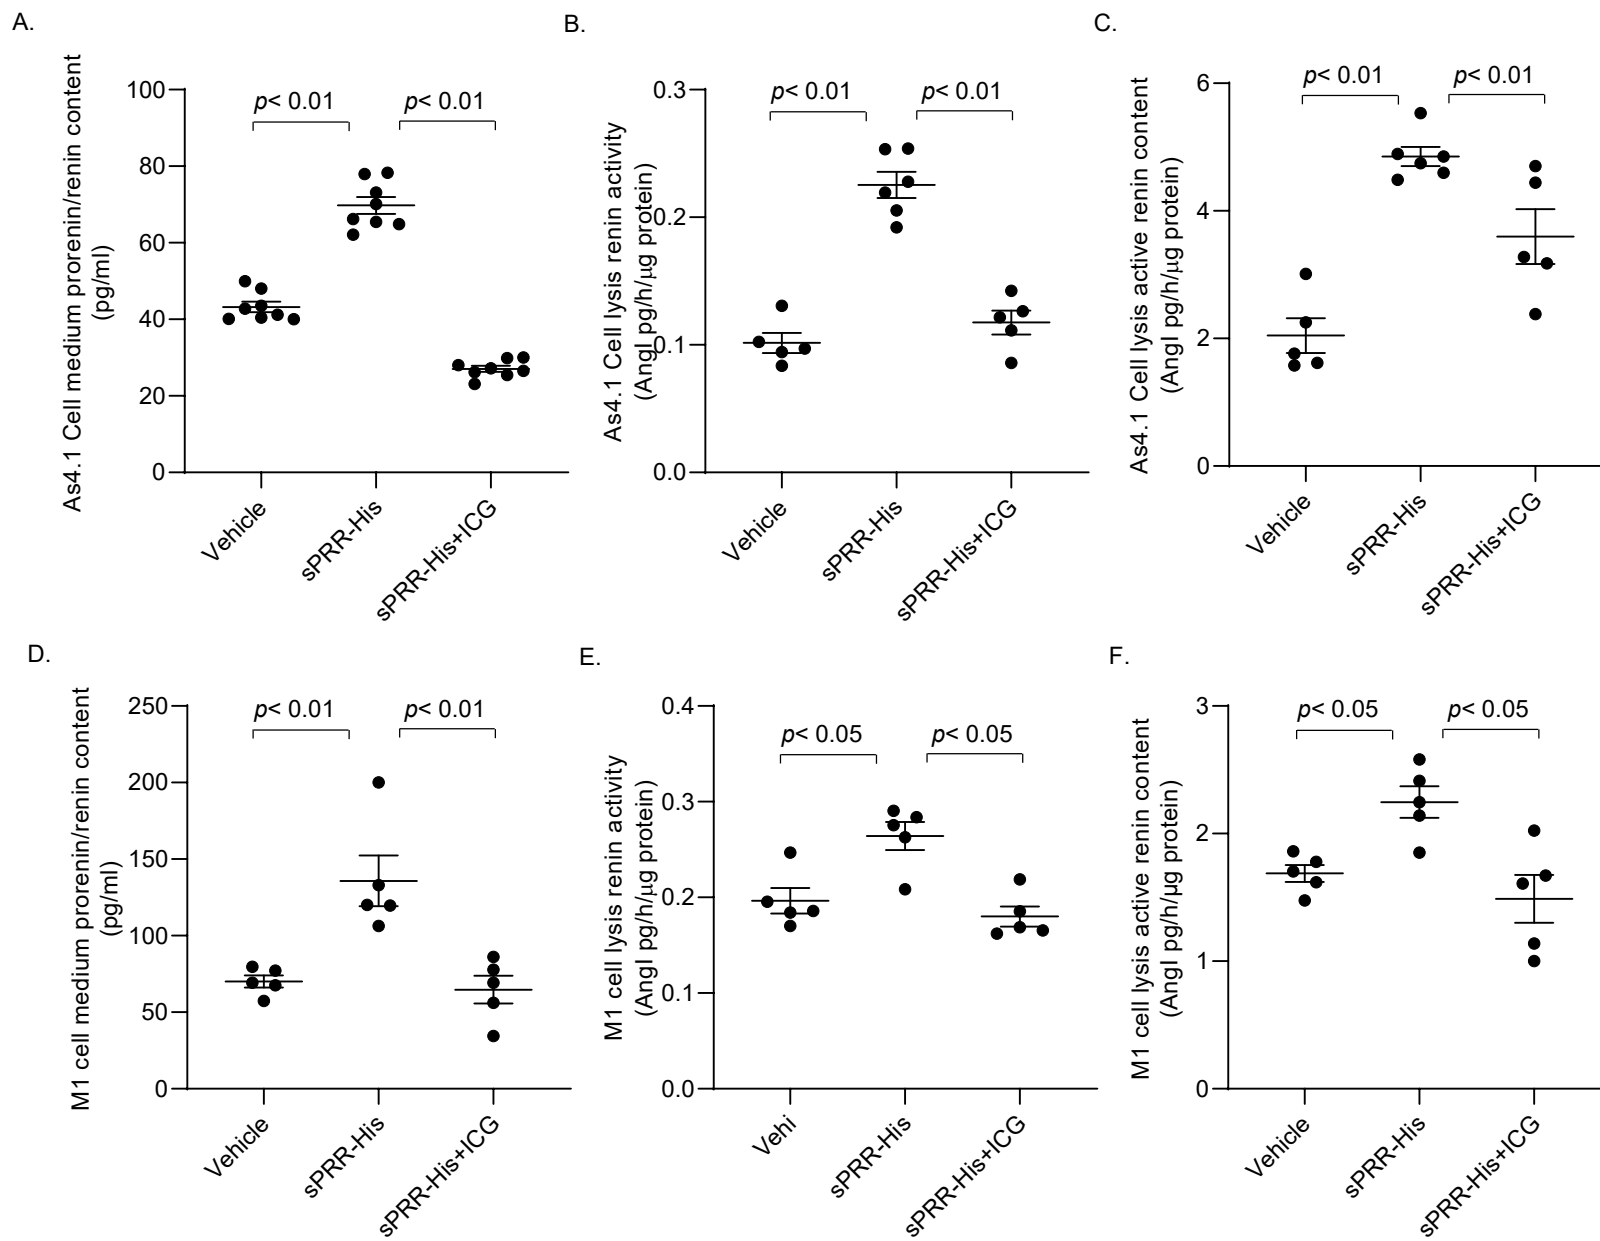

Supplement: NIHMS1812880-supplement-Supplement.pdf [file NIHMS1812880-supplement-Supplement.pdf]
